# Supplementary material for: Antifungal Activities of Bacillus mojavensis BQ-33 towards the Kiwifruit Black Spot Disease Caused by the Fungal Pathogen Didymella glomerata
Source: MDPI journal article supplement (doi:10.3390/microorganisms10102085), 2022-10-21
Supplement: s1 [file s1]

**Antifungal activities of *Bacillus mojavensis* BQ-33 towards the kiwifruit black spot disease caused by the fungal pathogen *Didymella glomerata***

**Table S1.** Antagonistic evaluation of bacterial strains against *Didymella glomerata*

| Stran's name | Sources      | Inhibition ratio |
|--------------|--------------|------------------|
| BQ-4         | soil Guizhou | 57.70 ± 0.65 opq |
| BQ-5         | soil Guizhou | 60.37 ± 0.73 mn  |
| BQ-7         | soil Guizhou | 63.99 ± 1.46 ijk |
| BQ-9         | soil Guizhou | 65.80 ± 0.72 hi  |
| BQ-10        | soil Guizhou | 59.63 ± 0.69 mno |
| BQ-11        | soil Guizhou | 65.56 ± 0.46 hi  |
| BQ-13        | soil Guizhou | 61.29 ± 0.83 lm  |
| BQ-16        | soil Guizhou | 77.15 ± 0.54 b   |
| BQ-18        | soil Guizhou | 71.52 ± 0.47 f   |
| BQ-19        | soil Guizhou | 55.46 ± 0.71 qr  |
| BQ-21        | soil Guizhou | 64.27 ± 0.93 ij  |
| BQ-23        | soil Guizhou | 55.63 ± 0.67 qr  |
| BQ-24        | soil Guizhou | 73.40 ± 0.68 def |
| BQ-25        | soil Guizhou | 64.54 ± 0.69 ij  |
| BQ-27        | soil Guizhou | 75.13 ± 0.48 bcd |
| BQ-28        | soil Guizhou | 74.38 ± 0.58 cde |
| BQ-29        | soil Guizhou | 74.15 ± 1.00 cde |
| BQ-31        | soil Guizhou | 57.11 ± 1.30 pq  |

|       |              |                  |
|-------|--------------|------------------|
| BQ-32 | soil Guizhou | 65.45 ± 0.79 hi  |
| BQ-33 | soil Guizhou | 81.26 ± 0.53 a   |
| BQ-38 | soil Guizhou | 62.72 ± 0.80 jkl |
| BQ-41 | soil Guizhou | 54.61 ± 0.52 rs  |
| BQ-42 | soil Guizhou | 51.48 ± 0.39 t   |
| BQ-44 | soil Guizhou | 61.73 ± 0.91 klm |
| BQ-47 | soil Guizhou | 58.52 ± 0.46 nop |
| BQ-48 | soil Guizhou | 62.85 ± 0.42 jkl |
| BQ-50 | soil Guizhou | 60.80 ± 0.34 lm  |
| BQ-53 | soil Guizhou | 53.80 ± 0.81 rs  |
| BQ-54 | soil Guizhou | 64.69 ± 1.21 ij  |
| BQ-58 | soil Guizhou | 67.27 ± 0.48 gh  |
| BQ-64 | soil Guizhou | 56.12 ± 0.39 qr  |
| BQ-66 | soil Guizhou | 69.24 ± 1.09 g   |
| BQ-71 | soil Guizhou | 52.81 ± 0.36 st  |
| BQ-73 | soil Guizhou | 72.42 ± 0.78 ef  |
| BQ-77 | soil Guizhou | 76.27 ± 0.60 bc  |
| BQ-78 | soil Guizhou | 68.07 ± 0.48 g   |

---

Note: Numerical values were expressed as mean ± standard error (SE) of triplicates. Different lowercase letters represent a significant difference ( $p < 0.05$ ,  $n = 3$ ).

**Table S2.** Reference isolates used in the present study and their GenBank accession numbers.

| Species                           | Culture<br>Accession      | GenBank Accession |              |
|-----------------------------------|---------------------------|-------------------|--------------|
|                                   |                           | 16S rDNA          | <i>gyrA</i>  |
| <i>Bacillus amyloliquefaciens</i> | DSM7 <sup>T</sup>         | FN597644          | FN597644     |
| <i>Bacillus atrophaeus</i>        | NRRL NRS 213 <sup>T</sup> | LSBB01000022      | EU138654     |
| <i>Bacillus halotolerans</i>      | KKD1                      | CP054584          | CP054584     |
| <i>Bacillus halotolerans</i>      | MBH1                      | CP070976          | CP070976     |
| <i>Bacillus inaquosorum</i>       | NRRL B-23052 <sup>T</sup> | NR-116188         | EU138605     |
| <i>Bacillus mojavenensis</i>      | UCMB5075 <sup>T</sup>     | CP051464          | CP051464     |
| <i>Bacillus nakamurai</i>         | NRRL B-41091 <sup>T</sup> | NR151897          | LSAZ00000000 |
| <i>Bacillus siamensis</i>         | KCTC 13613 <sup>T</sup>   | AJVF01000001      | AJVF01000001 |
| <i>Bacillus sonorensis</i>        | NRRL B-23154 <sup>T</sup> | MF446619          | EU138611     |
| <i>Bacillus spizizenii</i>        | NRRL B-23049 <sup>T</sup> | NR024931          | EU138602     |
| <i>Bacillus subtilis</i>          | NCIB3610 <sup>T</sup>     | CP020102          | EF134425     |
| <i>Bacillus subtilis</i>          | NRRL B-4219 <sup>T</sup>  | NR116183          | EU138592     |
| <i>Bacillus subtilis</i>          | TU-B-10 <sup>T</sup>      | NC016047          | NC016047     |
| <i>Bacillus vallismortis</i>      | NRRL B-14890 <sup>T</sup> | NR-116186         | EU138601     |
| <i>Bacillus velezensis</i>        | SQR9 <sup>T</sup>         | CP006890          | CP006890     |
| <i>Bacillus velezensis</i>        | NRRL B-41580 <sup>T</sup> | LLZC00000000      | EU138622     |
| <i>Bacillus velezensis</i>        | FZB42 <sup>T</sup>        | NC009725          | NC009725     |
| <i>Halobacillus halophilus</i>    | DSM 2266 <sup>T</sup>     | NC017668          | NC017668     |

Note: The order of the strains was alphabetical. T = type strain.
